# Supplementary material
Source: Springer Nature journal article supplement (https://www.springermedizin.de/resource/supplementary/12890_2014_479_MOESM1_ESM.pdf/9505322)

# Conceptual Model for Taking Healthy Steps

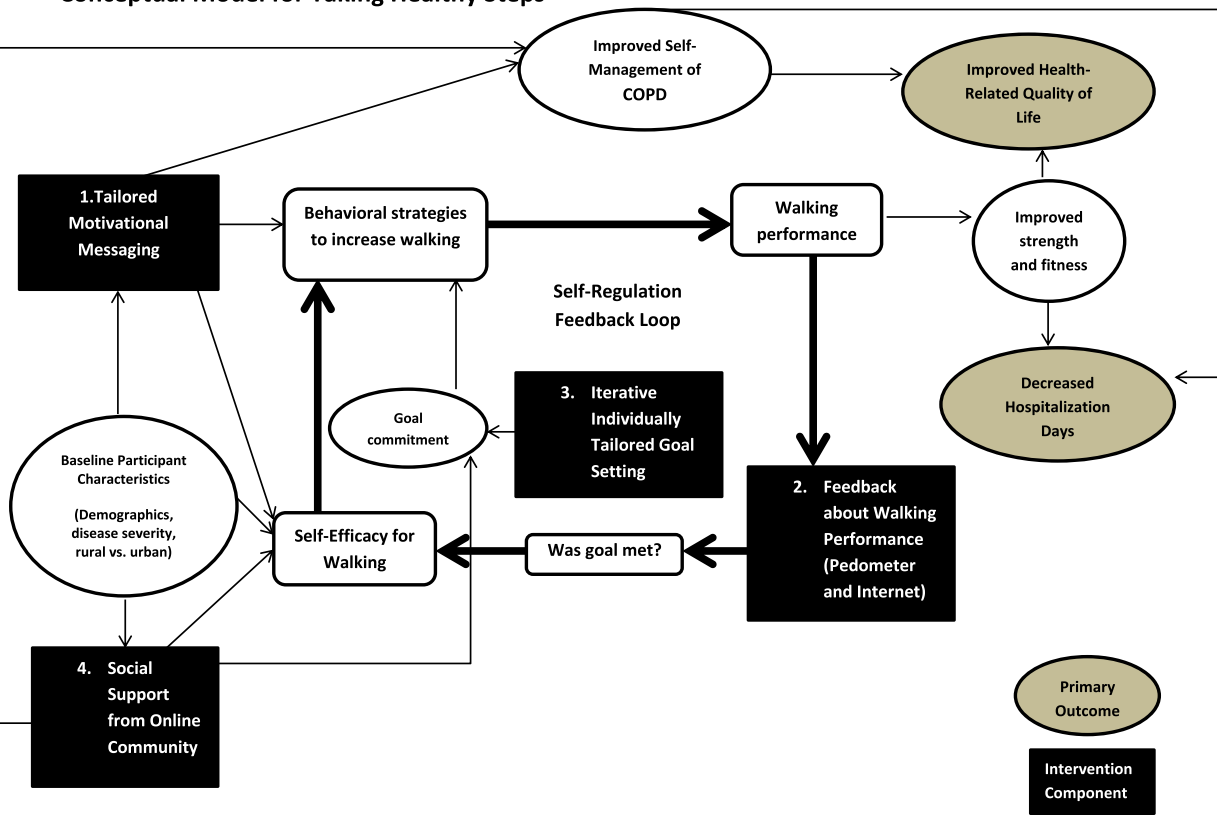

Supplement: MOESM1 [file 9505322]
